# Supplementary material for: Saccharides from Arctium lappa L. root reduce platelet activation and thrombus formation in a laser injury thrombosis mouse model
Source: PubMed Central journal article supplement — Exp Ther Med. 2022 Mar 22;23(5):344. doi: 10.3892/etm.2022.11274 (PMC8988163; doi:10.3892/etm.2022.11274), 2022-03-22

Figure S1. Representative histograms of platelet ROS generation induced by CRP (2  $\mu\text{g}/\text{ml}$ ), thrombin (0.025 U/ml) and ADP (10  $\mu\text{M}$ ). H2DCFDA-loaded (50  $\mu\text{mol}/\text{l}$ ) platelets were incubated with or without ALR-S (20, 60 and 200  $\mu\text{g}/\text{ml}$ ) and stimulated with CRP, thrombin or ADP for 5 min at 37°C in darkness. Samples were then diluted with 10-fold HEPES-Tyrode's buffer containing 50  $\mu\text{mol}/\text{l}$  H2DCFDA and analyzed by flow cytometry immediately. ALR-S, saccharides from *Arctium lappa* L. root; H2DCFDA, 2',7'-dichlorodihydrofluorescein diacetate; CRP, collagen-related peptide.

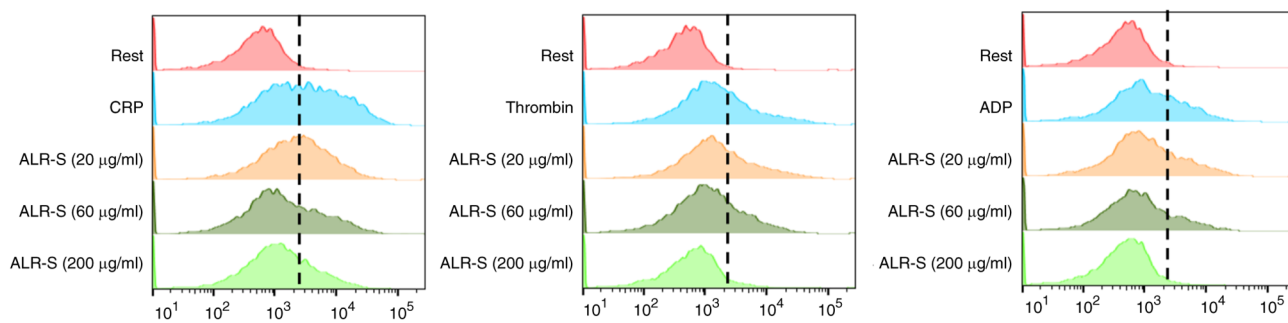

Supplement: Supplementary_Data.pdf [file Supplementary_Data.pdf]
